# Supplementary material
Source: publisher figshare collection journal article supplement (https://sage.figshare.com/ndownloader/files/12370883)

## Supplementary figure legends

**Figure S1** Flow cytometric analysis of the percentage of cells expressing insulin in both undifferentiated and differentiated EMSCs.

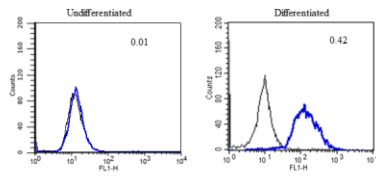

Supplement: Supplementary file 1 [file 12370883]
